# Supplementary material for: Burnout among Telecommunication Sales Managers
Source: MDPI journal article supplement (doi:10.3390/ijerph191811249), 2022-09-07
Supplement: s1 [file s1]

**Table S1.** Means, standard deviations (SD), and normality tests of the study variables

|                            | N   | Mean  | SD    | Skewness  |            | Kurtosis  |            |
|----------------------------|-----|-------|-------|-----------|------------|-----------|------------|
|                            |     |       |       | Statistic | Std. Error | Statistic | Std. Error |
| Emotional exhaustion       | 849 | 18.18 | 10.82 | .181      | .084       | -1.081    | .168       |
| Depersonalisation          | 849 | 14.91 | 8.42  | .329      | .084       | -.628     | .168       |
| RPA                        | 849 | 17.66 | 8.10  | -.351     | .084       | -.315     | .168       |
| Job demands                | 849 | 12.09 | 2.47  | .023      | .084       | -.520     | .168       |
| Job control                | 849 | 14.00 | 3.69  | -.221     | .084       | -.681     | .168       |
| Social support at work     | 849 | 14.41 | 4.63  | .467      | .084       | -.891     | .168       |
| Negative acts at work      | 849 | 42.52 | 17.09 | .294      | .084       | -1.413    | .168       |
| Bullying exposure duration | 849 | 1.98  | 1.44  | 1.675     | .084       | 1.870     | .168       |
| Bullying witnessing        | 849 | 1.69  | 0.89  | 1.011     | .084       | -.109     | .168       |
| BEWFR                      | 849 | 1.84  | 1.12  | .909      | .084       | -.746     | .168       |
| Job satisfaction           | 849 | 24.72 | 5.38  | .416      | .084       | .179      | .168       |
| LE                         | 849 | 3.03  | 3.17  | 1.582     | .084       | 1.859     | .168       |
| Night work                 | 849 | 3.22  | 0.84  | -.440     | .084       | -1.455    | .168       |
| PW                         | 849 | 3.20  | 0.83  | -.569     | .084       | -.819     | .168       |
| Gender                     | 849 | 1.62  | 0.49  | -.504     | .084       | -1.750    | .168       |
| Age                        | 849 | 27.78 | 6.69  | 1.383     | .084       | 1.064     | .168       |
| Education                  | 849 | 1.42  | 0.75  | 1.394     | .084       | .223      | .168       |
| Physical activity          | 849 | 4.12  | 1.71  | -.231     | .084       | -.854     | .168       |
| Smoking                    | 849 | 2.44  | 1.41  | .939      | .084       | .019      | .168       |
| Alcohol                    | 849 | 2.94  | 1.66  | .124      | .084       | -1.408    | .168       |
| Body mass index            | 849 | 23.58 | 2.70  | -.052     | .084       | -.248     | .168       |
| Family crises              | 849 | 1.47  | 0.89  | 1.639     | .084       | 1.241     | .168       |
| Self-rated health          | 849 | 2.28  | 0.83  | .110      | .084       | -.593     | .168       |

Notes. SD–standard deviation. Std. Error–standard error. RPA–Reduced personal accomplishment. BEWFR–Bullying effect on workplace and family relations. LE– Length of employment in the company. PW–Physical work (lifting, pushing, carrying, transporting).
